# Supplementary material for: Development of β-carotene, lysine, and tryptophan-rich maize (Zea mays) inbreds through marker-assisted gene pyramiding
Source: PubMed Central journal article supplement (PMC9123160; doi:10.1038/s41598-022-11585-y), 2022-05-20
Supplement: 41598_2022_11585_MOESM1_ESM.pdf [file 41598_2022_11585_MOESM1_ESM.pdf]

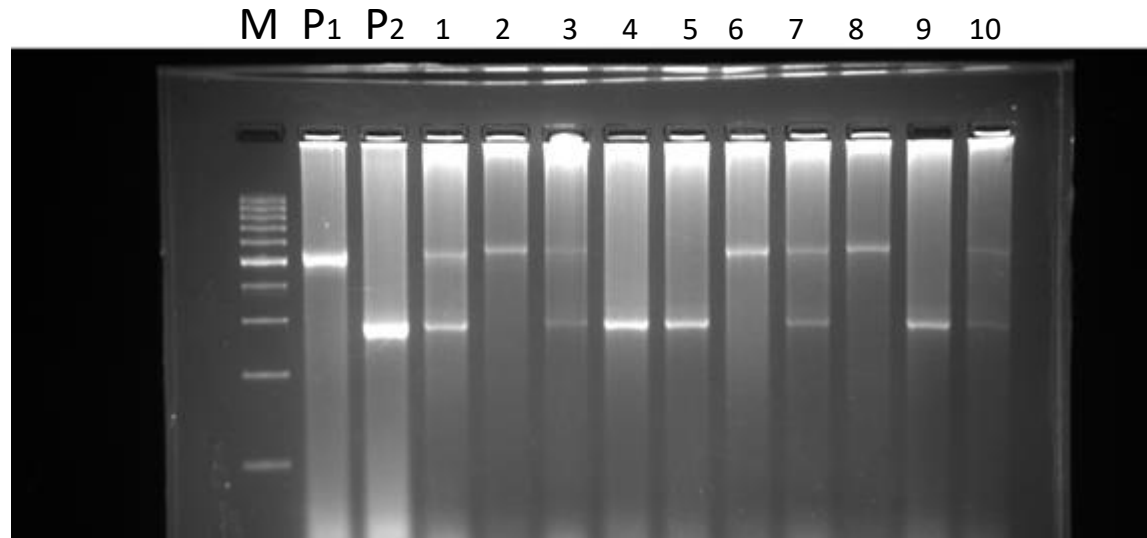

**Figure 1. Foreground and background selection and morphological traits evaluation in ICF<sub>2</sub> and ICF<sub>3</sub> populations.** (a), Foreground selection of ICF<sub>2</sub> lines from DBT-IC- $\beta_1\sigma_4$  using *crtRBI* gene specific marker *crtRBI* 3'TE, (M) Ladder (100 bp), (P<sub>1</sub>) CE477, (P<sub>2</sub>) UMI1200, (1-10) ICF<sub>2</sub> plants

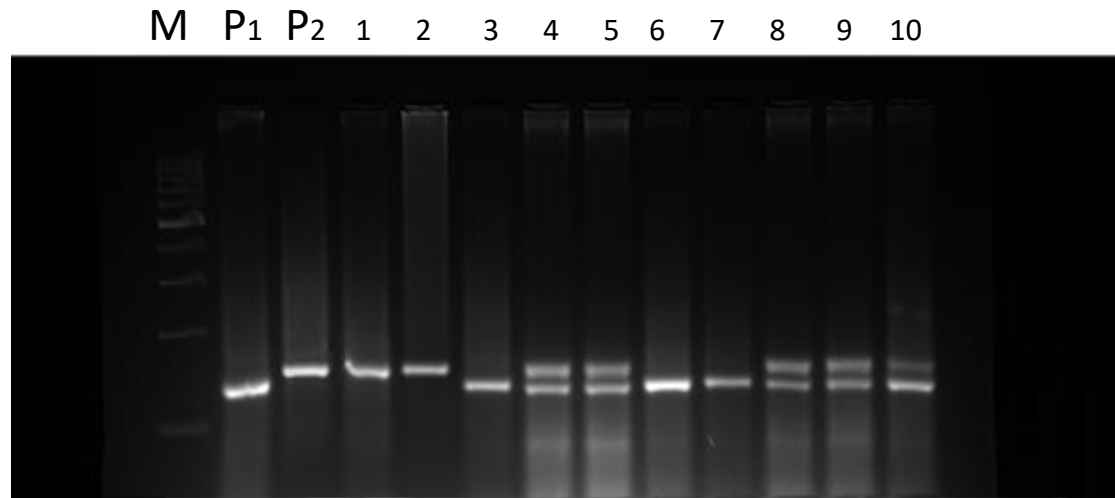

**Figure 1. Foreground and background selection and morphological traits evaluation in ICF<sub>2</sub> and ICF<sub>3</sub> populations. (b),** Foreground selection of ICF<sub>2</sub> lines from DBT-IC- $\beta_1\sigma_4$ , using *o2* gene linked marker *umc1066*, (M) Ladder (100 bp), (P<sub>1</sub>) UMI1200, (P<sub>2</sub>) VQL 1, (1-10) ICF<sub>2</sub> plants

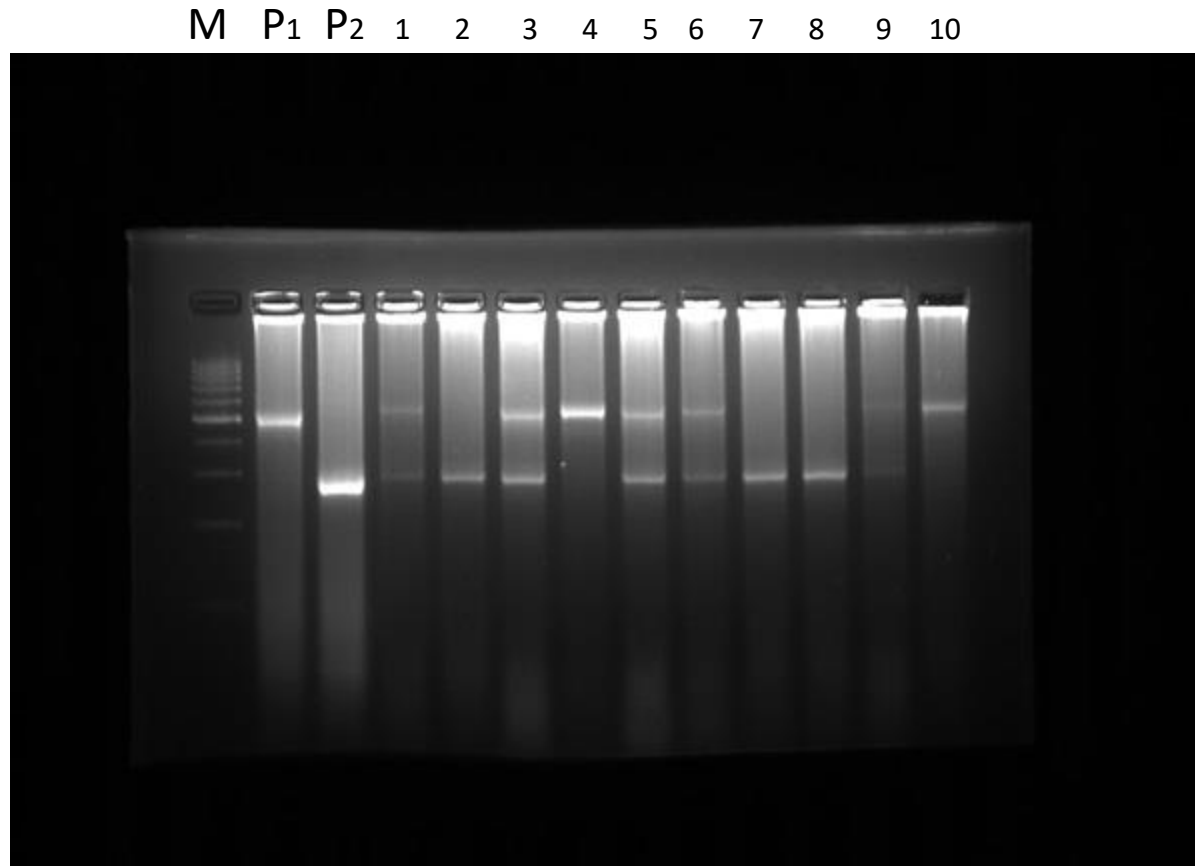

**Figure 1. Foreground and background selection and morphological traits evaluation in ICF2 and ICF3 populations. (c),** Foreground selection of ICF<sub>2</sub> lines from DBT-IC-β<sub>2</sub>σ<sub>5</sub> using *crtRB1* gene specific marker *crtRB1* 3'TE, (M) Ladder (100 bp), (P<sub>1</sub>) CE477, (P<sub>2</sub>) UMI1230, (1-10) ICF<sub>2</sub> plants

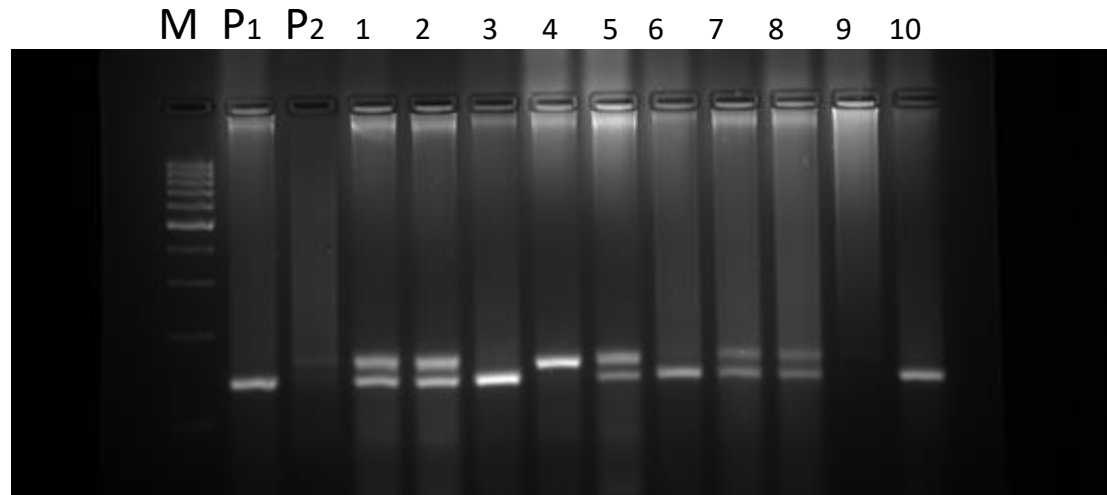

**Figure 1. Foreground and background selection and morphological traits evaluation in ICF 2 and ICF3 populations. (d),** Foreground selection of ICF<sub>2</sub> lines from DBT-IC- $\beta_2\sigma_5$  using *o2* gene linked marker *umc1066*, (M) Ladder (100 bp), (P<sub>1</sub>) UMI1230, (P<sub>2</sub>) VQL 1, (1-10) ICF<sub>2</sub> plants

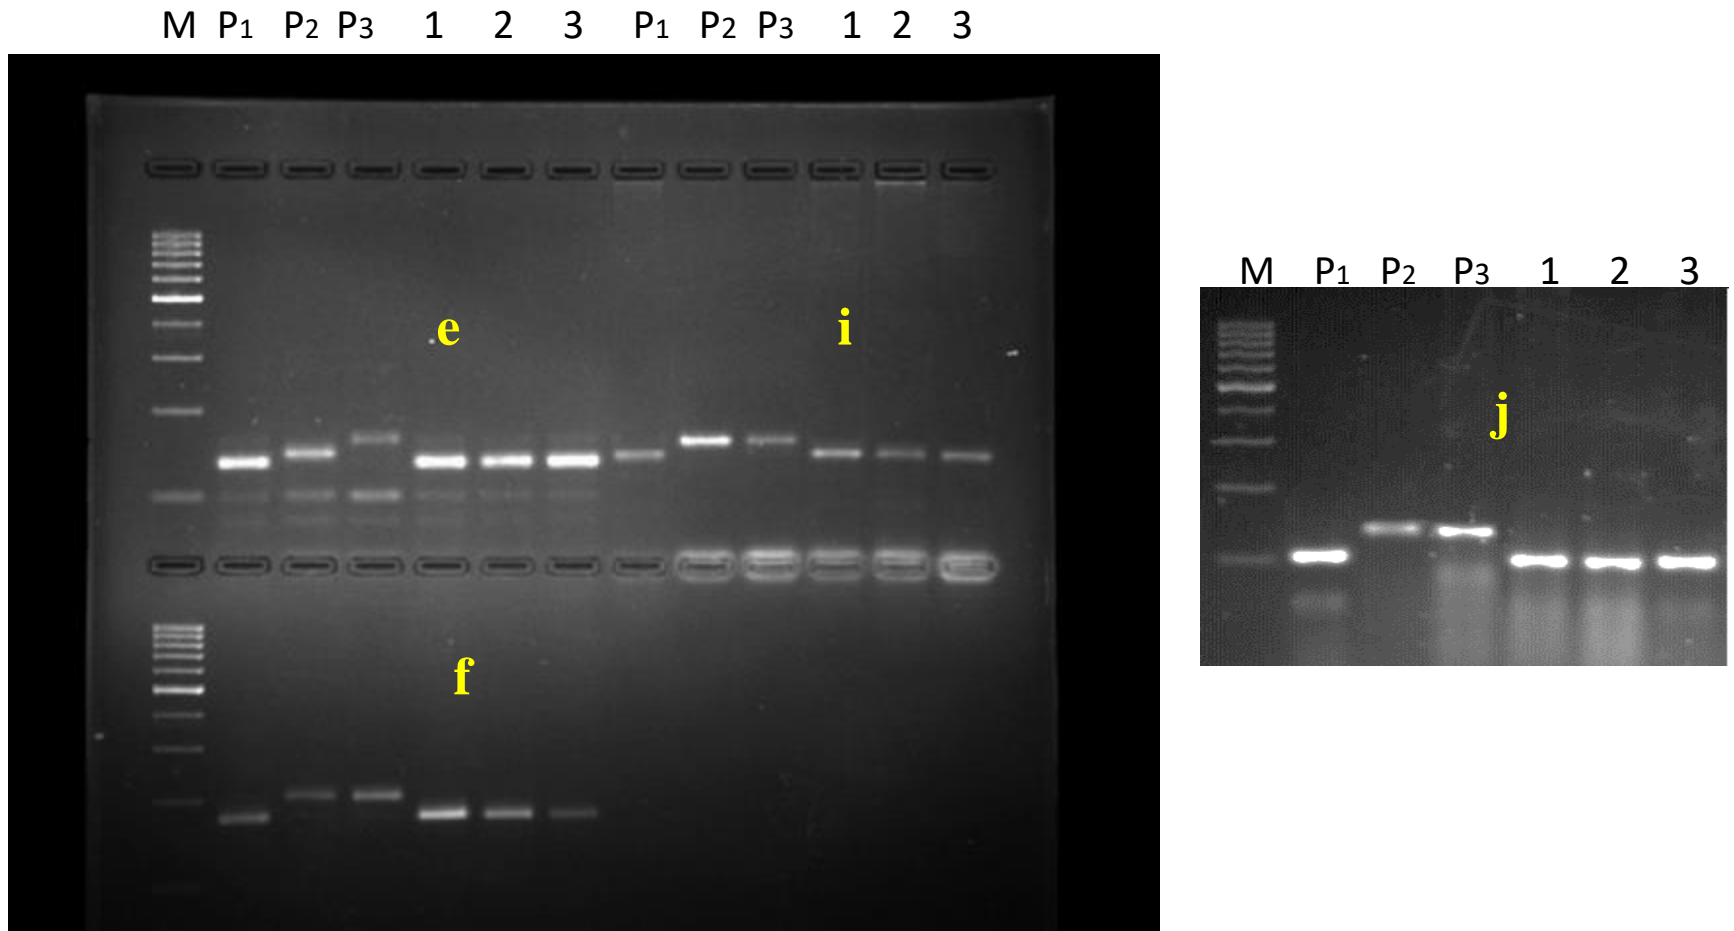

**Figure 1. Foreground and background selection and morphological traits evaluation in ICF2 and ICF3 populations. (e,f, i and j), Background selection of ICF<sub>3</sub> lines from DBT-IC- $\beta_1\sigma_4$ , (M) Ladder (100 bp), (P<sub>1</sub>) UMI1200, (P<sub>2</sub>) CE477, (P<sub>3</sub>) VQL 1, (1-3) ICF<sub>3</sub> plants**

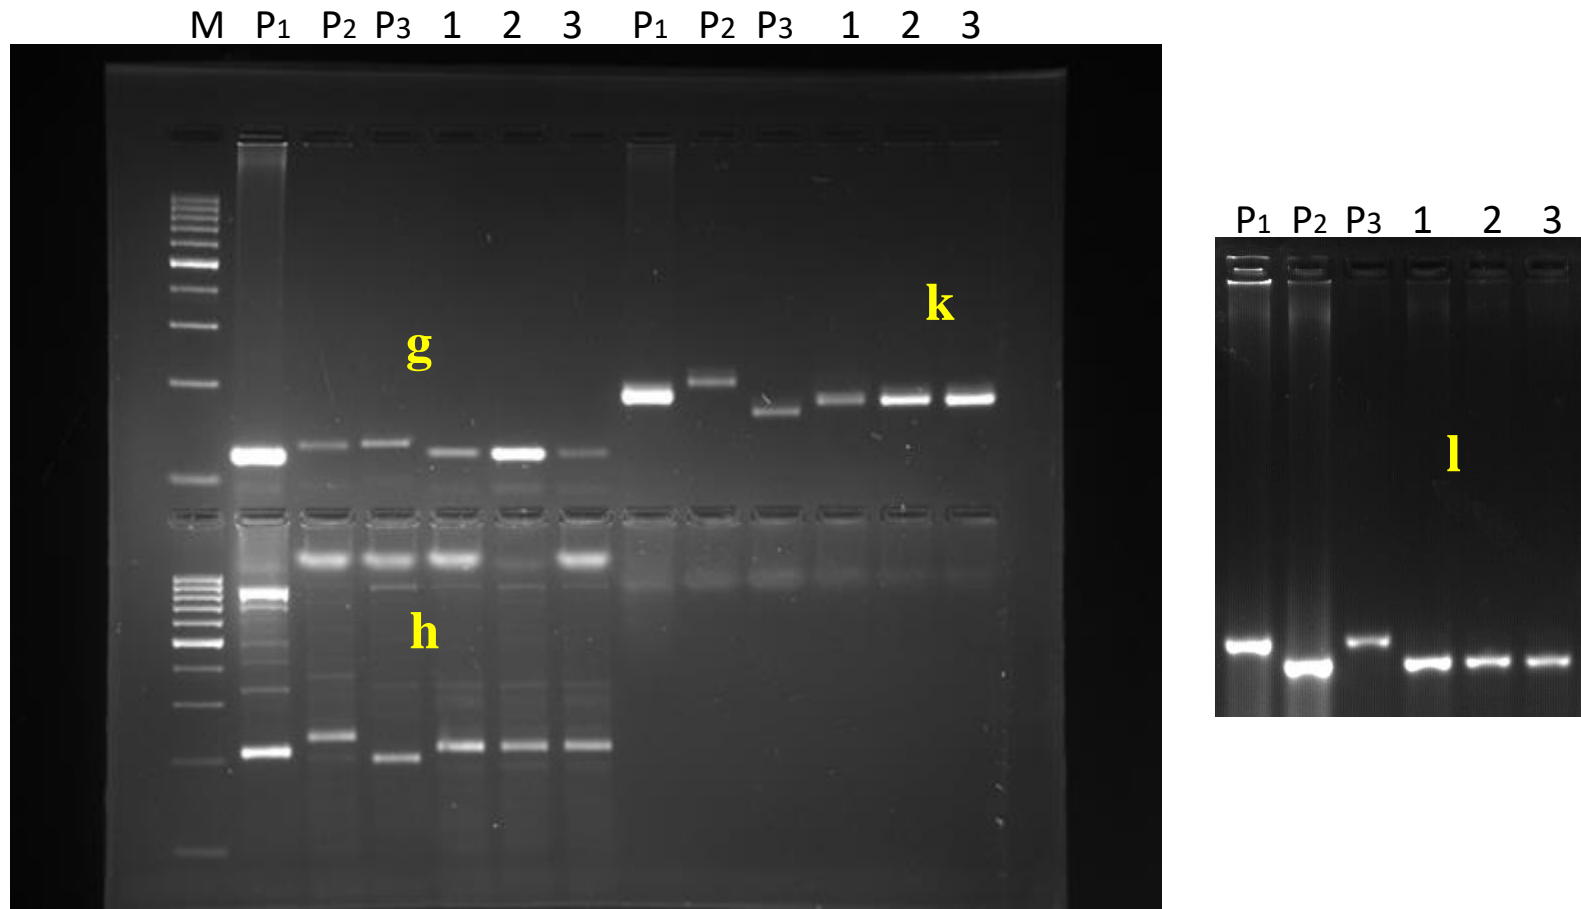

**Figure 1. Foreground and background selection and morphological traits evaluation in ICF<sub>2</sub> and ICF<sub>3</sub> populations. (g,h,k, and l), Background selection of ICF<sub>3</sub> lines from DBT-IC- $\beta_2\sigma_5$ , (M) Ladder (100 bp), (P<sub>1</sub>) UMI1230, (P<sub>2</sub>) CE477, (P<sub>3</sub>) VQL 1, (1-3) ICF<sub>2</sub> plants.**
